# Supplementary material for: Dissecting the Genetic Causality Between Immune Cell Traits and ER-Negative Breast Cancer Outcomes
Source: Research Square preprint supplement (doi:10.21203/rs.3.rs-7166891/v1), 2025-08-21
Supplement: Supplementary file 1 [file 155bda2f3d032b2253b02350.xlsx]

## Sheet: heterogeneity_results-1
id	id.exposure	id.outcome	outcome	exposure	method	Q	Q_df	Q_pval
ebi-a-GCST90001395	ieu-a-1163	ebi-a-GCST90001395	IgD+ CD38- B cell %B cell || id:ebi-a-GCST90001395	|| id:ieu-a-1163	MR Egger	10.8132308386092	12	0.544989100280576
ebi-a-GCST90001395	ieu-a-1163	ebi-a-GCST90001395	IgD+ CD38- B cell %B cell || id:ebi-a-GCST90001395	|| id:ieu-a-1163	Inverse variance weighted	11.1864970710242	13	0.595197504472649
ebi-a-GCST90001396	ieu-a-1163	ebi-a-GCST90001396	IgD+ CD38- B cell Absolute Count || id:ebi-a-GCST90001396	|| id:ieu-a-1163	MR Egger	11.7890503684403	12	0.462766665144423
ebi-a-GCST90001396	ieu-a-1163	ebi-a-GCST90001396	IgD+ CD38- B cell Absolute Count || id:ebi-a-GCST90001396	|| id:ieu-a-1163	Inverse variance weighted	11.9201955047066	13	0.53419847471348
ebi-a-GCST90001398	ieu-a-1163	ebi-a-GCST90001398	Unswitched memory B cell Absolute Count || id:ebi-a-GCST90001398	|| id:ieu-a-1163	MR Egger	9.83354621611567	12	0.630560859190031
ebi-a-GCST90001398	ieu-a-1163	ebi-a-GCST90001398	Unswitched memory B cell Absolute Count || id:ebi-a-GCST90001398	|| id:ieu-a-1163	Inverse variance weighted	10.0367525405237	13	0.69092625423263
ebi-a-GCST90001431	ieu-a-1163	ebi-a-GCST90001431	IgD+ CD38- B cell %lymphocyte || id:ebi-a-GCST90001431	|| id:ieu-a-1163	MR Egger	10.8923077581834	12	0.538169831003577
ebi-a-GCST90001431	ieu-a-1163	ebi-a-GCST90001431	IgD+ CD38- B cell %lymphocyte || id:ebi-a-GCST90001431	|| id:ieu-a-1163	Inverse variance weighted	10.996311570258	13	0.611126626257434
ebi-a-GCST90001432	ieu-a-1163	ebi-a-GCST90001432	Unswitched memory B cell %lymphocyte || id:ebi-a-GCST90001432	|| id:ieu-a-1163	MR Egger	9.40530822596723	12	0.667977082676351
ebi-a-GCST90001432	ieu-a-1163	ebi-a-GCST90001432	Unswitched memory B cell %lymphocyte || id:ebi-a-GCST90001432	|| id:ieu-a-1163	Inverse variance weighted	9.65268562604952	13	0.722058820056852
ebi-a-GCST90001450	ieu-a-1163	ebi-a-GCST90001450	CD62L- monocyte Absolute Count || id:ebi-a-GCST90001450	|| id:ieu-a-1163	MR Egger	15.7280670976636	12	0.204010936482685
ebi-a-GCST90001450	ieu-a-1163	ebi-a-GCST90001450	CD62L- monocyte Absolute Count || id:ebi-a-GCST90001450	|| id:ieu-a-1163	Inverse variance weighted	17.4173343534681	13	0.180921391278339
ebi-a-GCST90001452	ieu-a-1163	ebi-a-GCST90001452	CD11c+ CD62L- monocyte Absolute Count || id:ebi-a-GCST90001452	|| id:ieu-a-1163	MR Egger	9.31360763068954	12	0.67593639311678
ebi-a-GCST90001452	ieu-a-1163	ebi-a-GCST90001452	CD11c+ CD62L- monocyte Absolute Count || id:ebi-a-GCST90001452	|| id:ieu-a-1163	Inverse variance weighted	10.8372995494156	13	0.624445450134424
ebi-a-GCST90001454	ieu-a-1163	ebi-a-GCST90001454	CD62L- HLA DR++ monocyte Absolute Count || id:ebi-a-GCST90001454	|| id:ieu-a-1163	MR Egger	11.5023304669492	12	0.486428360557449
ebi-a-GCST90001454	ieu-a-1163	ebi-a-GCST90001454	CD62L- HLA DR++ monocyte Absolute Count || id:ebi-a-GCST90001454	|| id:ieu-a-1163	Inverse variance weighted	12.3145817065255	13	0.502032254752662
ebi-a-GCST90001455	ieu-a-1163	ebi-a-GCST90001455	CD62L- HLA DR++ monocyte %monocyte || id:ebi-a-GCST90001455	|| id:ieu-a-1163	MR Egger	5.81112113561811	12	0.925302179182828
ebi-a-GCST90001455	ieu-a-1163	ebi-a-GCST90001455	CD62L- HLA DR++ monocyte %monocyte || id:ebi-a-GCST90001455	|| id:ieu-a-1163	Inverse variance weighted	5.83487430998688	13	0.951956508418839
ebi-a-GCST90001456	ieu-a-1163	ebi-a-GCST90001456	CD11c+ HLA DR++ monocyte Absolute Count || id:ebi-a-GCST90001456	|| id:ieu-a-1163	MR Egger	9.67498196854106	12	0.644450186988948
ebi-a-GCST90001456	ieu-a-1163	ebi-a-GCST90001456	CD11c+ HLA DR++ monocyte Absolute Count || id:ebi-a-GCST90001456	|| id:ieu-a-1163	Inverse variance weighted	10.0435792349852	13	0.6903669133554
ebi-a-GCST90001526	ieu-a-1163	ebi-a-GCST90001526	CD33dim HLA DR+ CD11b+ %CD33dim HLA DR+ || id:ebi-a-GCST90001526	|| id:ieu-a-1163	MR Egger	6.50107	12	0.888750515709036
ebi-a-GCST90001526	ieu-a-1163	ebi-a-GCST90001526	CD33dim HLA DR+ CD11b+ %CD33dim HLA DR+ || id:ebi-a-GCST90001526	|| id:ieu-a-1163	Inverse variance weighted	6.95106023464021	13	0.904655961504405
ebi-a-GCST90001528	ieu-a-1163	ebi-a-GCST90001528	CD33dim HLA DR+ CD11b- %CD33dim HLA DR+ || id:ebi-a-GCST90001528	|| id:ieu-a-1163	MR Egger	6.90619617039649	12	0.863749706943486
ebi-a-GCST90001528	ieu-a-1163	ebi-a-GCST90001528	CD33dim HLA DR+ CD11b- %CD33dim HLA DR+ || id:ebi-a-GCST90001528	|| id:ieu-a-1163	Inverse variance weighted	7.21439201728567	13	0.890767463559691
ebi-a-GCST90001567	ieu-a-1163	ebi-a-GCST90001567	Naive CD4-CD8- T cell %CD4-CD8- T cell || id:ebi-a-GCST90001567	|| id:ieu-a-1163	MR Egger	10.0642251639307	12	0.610326137600751
ebi-a-GCST90001567	ieu-a-1163	ebi-a-GCST90001567	Naive CD4-CD8- T cell %CD4-CD8- T cell || id:ebi-a-GCST90001567	|| id:ieu-a-1163	Inverse variance weighted	11.4483859277472	13	0.573309117058605
ebi-a-GCST90001579	ieu-a-1163	ebi-a-GCST90001579	CD14- CD16+ monocyte Absolute Count || id:ebi-a-GCST90001579	|| id:ieu-a-1163	MR Egger	9.94577894824169	12	0.620717550643963
ebi-a-GCST90001579	ieu-a-1163	ebi-a-GCST90001579	CD14- CD16+ monocyte Absolute Count || id:ebi-a-GCST90001579	|| id:ieu-a-1163	Inverse variance weighted	9.95287714042385	13	0.697783159743993
ebi-a-GCST90001584	ieu-a-1163	ebi-a-GCST90001584	CD14- CD16+ monocyte %monocyte || id:ebi-a-GCST90001584	|| id:ieu-a-1163	MR Egger	11.4905634388014	12	0.487409434972698
ebi-a-GCST90001584	ieu-a-1163	ebi-a-GCST90001584	CD14- CD16+ monocyte %monocyte || id:ebi-a-GCST90001584	|| id:ieu-a-1163	Inverse variance weighted	11.5575614573333	13	0.564213781775946
ebi-a-GCST90001593	ieu-a-1163	ebi-a-GCST90001593	CD8+ T cell %T cell || id:ebi-a-GCST90001593	|| id:ieu-a-1163	MR Egger	11.5999061060368	12	0.478322461431544
ebi-a-GCST90001593	ieu-a-1163	ebi-a-GCST90001593	CD8+ T cell %T cell || id:ebi-a-GCST90001593	|| id:ieu-a-1163	Inverse variance weighted	11.6674823712101	13	0.555080516979911
ebi-a-GCST90001606	ieu-a-1163	ebi-a-GCST90001606	CD4+ T cell %leukocyte || id:ebi-a-GCST90001606	|| id:ieu-a-1163	MR Egger	14.1245084439297	12	0.292828182798927
ebi-a-GCST90001606	ieu-a-1163	ebi-a-GCST90001606	CD4+ T cell %leukocyte || id:ebi-a-GCST90001606	|| id:ieu-a-1163	Inverse variance weighted	14.1337226476014	13	0.364494444167215
ebi-a-GCST90001674	ieu-a-1163	ebi-a-GCST90001674	CD28- CD127- CD25++ CD8+ T cell %CD8+ T cell || id:ebi-a-GCST90001674	|| id:ieu-a-1163	MR Egger	11.0742703999503	12	0.522564660025759
ebi-a-GCST90001674	ieu-a-1163	ebi-a-GCST90001674	CD28- CD127- CD25++ CD8+ T cell %CD8+ T cell || id:ebi-a-GCST90001674	|| id:ieu-a-1163	Inverse variance weighted	11.1204011710205	13	0.600731852232637
ebi-a-GCST90001677	ieu-a-1163	ebi-a-GCST90001677	CD28- CD25++ CD8+ T cell %CD8+ T cell || id:ebi-a-GCST90001677	|| id:ieu-a-1163	MR Egger	12.486469743743	12	0.407442632724012
ebi-a-GCST90001677	ieu-a-1163	ebi-a-GCST90001677	CD28- CD25++ CD8+ T cell %CD8+ T cell || id:ebi-a-GCST90001677	|| id:ieu-a-1163	Inverse variance weighted	12.5598452476659	13	0.482355481001033
ebi-a-GCST90001698	ieu-a-1163	ebi-a-GCST90001698	CD45RA+ CD28- CD8+ T cell Absolute Count || id:ebi-a-GCST90001698	|| id:ieu-a-1163	MR Egger	25.1669739117628	12	0.0140511567227934
ebi-a-GCST90001698	ieu-a-1163	ebi-a-GCST90001698	CD45RA+ CD28- CD8+ T cell Absolute Count || id:ebi-a-GCST90001698	|| id:ieu-a-1163	Inverse variance weighted	25.3375078761685	13	0.0208350419278311
ebi-a-GCST90001810	ieu-a-1163	ebi-a-GCST90001810	CD38 on CD3- CD19- || id:ebi-a-GCST90001810	|| id:ieu-a-1163	MR Egger	19.3189700449202	12	0.0811160519614465
ebi-a-GCST90001810	ieu-a-1163	ebi-a-GCST90001810	CD38 on CD3- CD19- || id:ebi-a-GCST90001810	|| id:ieu-a-1163	Inverse variance weighted	19.7080073154762	13	0.102734019597262
ebi-a-GCST90001820	ieu-a-1163	ebi-a-GCST90001820	IgD on IgD+ CD24+ B cell || id:ebi-a-GCST90001820	|| id:ieu-a-1163	MR Egger	15.8701789307669	12	0.197254729583194
ebi-a-GCST90001820	ieu-a-1163	ebi-a-GCST90001820	IgD on IgD+ CD24+ B cell || id:ebi-a-GCST90001820	|| id:ieu-a-1163	Inverse variance weighted	16.5027751573079	13	0.223042080368959
ebi-a-GCST90001821	ieu-a-1163	ebi-a-GCST90001821	IgD on IgD+ CD24- B cell || id:ebi-a-GCST90001821	|| id:ieu-a-1163	MR Egger	12.7221799988388	12	0.389553062109613
ebi-a-GCST90001821	ieu-a-1163	ebi-a-GCST90001821	IgD on IgD+ CD24- B cell || id:ebi-a-GCST90001821	|| id:ieu-a-1163	Inverse variance weighted	12.8725875121617	13	0.457700923961562
ebi-a-GCST90001824	ieu-a-1163	ebi-a-GCST90001824	IgD on IgD+ CD38+ B cell || id:ebi-a-GCST90001824	|| id:ieu-a-1163	MR Egger	7.80043737878088	12	0.800524612829553
ebi-a-GCST90001824	ieu-a-1163	ebi-a-GCST90001824	IgD on IgD+ CD38+ B cell || id:ebi-a-GCST90001824	|| id:ieu-a-1163	Inverse variance weighted	8.5976443285158	13	0.802607453780891
ebi-a-GCST90001830	ieu-a-1163	ebi-a-GCST90001830	BAFF-R on CD20- B cell || id:ebi-a-GCST90001830	|| id:ieu-a-1163	MR Egger	8.81727707267046	11	0.63875404859445
ebi-a-GCST90001830	ieu-a-1163	ebi-a-GCST90001830	BAFF-R on CD20- B cell || id:ebi-a-GCST90001830	|| id:ieu-a-1163	Inverse variance weighted	9.92875181111723	12	0.622211255621661
ebi-a-GCST90001834	ieu-a-1163	ebi-a-GCST90001834	CD62L on monocyte || id:ebi-a-GCST90001834	|| id:ieu-a-1163	MR Egger	8.52374698290633	10	0.577816779370238
ebi-a-GCST90001834	ieu-a-1163	ebi-a-GCST90001834	CD62L on monocyte || id:ebi-a-GCST90001834	|| id:ieu-a-1163	Inverse variance weighted	8.53685740755247	11	0.664557588733483
ebi-a-GCST90001850	ieu-a-1163	ebi-a-GCST90001850	CD3 on HLA DR+ CD8+ T cell || id:ebi-a-GCST90001850	|| id:ieu-a-1163	MR Egger	10.9187544916652	12	0.535894008322337
ebi-a-GCST90001850	ieu-a-1163	ebi-a-GCST90001850	CD3 on HLA DR+ CD8+ T cell || id:ebi-a-GCST90001850	|| id:ieu-a-1163	Inverse variance weighted	16.6906632790711	13	0.213833750440405
ebi-a-GCST90001852	ieu-a-1163	ebi-a-GCST90001852	CD3 on CD39+ resting CD4 regulatory T cell || id:ebi-a-GCST90001852	|| id:ieu-a-1163	MR Egger	10.3366106054559	12	0.586455968039811
ebi-a-GCST90001852	ieu-a-1163	ebi-a-GCST90001852	CD3 on CD39+ resting CD4 regulatory T cell || id:ebi-a-GCST90001852	|| id:ieu-a-1163	Inverse variance weighted	10.3372873628403	13	0.666147900880197
ebi-a-GCST90001862	ieu-a-1163	ebi-a-GCST90001862	CD3 on CD28+ CD4-CD8- T cell || id:ebi-a-GCST90001862	|| id:ieu-a-1163	MR Egger	12.9330356564678	12	0.373926692754357
ebi-a-GCST90001862	ieu-a-1163	ebi-a-GCST90001862	CD3 on CD28+ CD4-CD8- T cell || id:ebi-a-GCST90001862	|| id:ieu-a-1163	Inverse variance weighted	13.8812130645448	13	0.382262478367311
ebi-a-GCST90001872	ieu-a-1163	ebi-a-GCST90001872	HVEM on naive CD8+ T cell || id:ebi-a-GCST90001872	|| id:ieu-a-1163	MR Egger	13.1036982143943	12	0.361548745031465
ebi-a-GCST90001872	ieu-a-1163	ebi-a-GCST90001872	HVEM on naive CD8+ T cell || id:ebi-a-GCST90001872	|| id:ieu-a-1163	Inverse variance weighted	13.1070487115482	13	0.439577356627805
ebi-a-GCST90001884	ieu-a-1163	ebi-a-GCST90001884	CD16-CD56 on Natural Killer || id:ebi-a-GCST90001884	|| id:ieu-a-1163	MR Egger	6.7938041801564	12	0.870933538548227
ebi-a-GCST90001884	ieu-a-1163	ebi-a-GCST90001884	CD16-CD56 on Natural Killer || id:ebi-a-GCST90001884	|| id:ieu-a-1163	Inverse variance weighted	6.80295271727561	13	0.912018474645905
ebi-a-GCST90001894	ieu-a-1163	ebi-a-GCST90001894	CD28 on CD28+ CD4+ T cell || id:ebi-a-GCST90001894	|| id:ieu-a-1163	MR Egger	4.98379457480377	12	0.958518038966953
ebi-a-GCST90001894	ieu-a-1163	ebi-a-GCST90001894	CD28 on CD28+ CD4+ T cell || id:ebi-a-GCST90001894	|| id:ieu-a-1163	Inverse variance weighted	6.17715901885659	13	0.939466801463034
ebi-a-GCST90001898	ieu-a-1163	ebi-a-GCST90001898	CD28 on CD4+ T cell || id:ebi-a-GCST90001898	|| id:ieu-a-1163	MR Egger	7.30944723099108	12	0.836504902095219
ebi-a-GCST90001898	ieu-a-1163	ebi-a-GCST90001898	CD28 on CD4+ T cell || id:ebi-a-GCST90001898	|| id:ieu-a-1163	Inverse variance weighted	8.33329731111893	13	0.821229131100863
ebi-a-GCST90001918	ieu-a-1163	ebi-a-GCST90001918	CD45 on HLA DR+ T cell || id:ebi-a-GCST90001918	|| id:ieu-a-1163	MR Egger	13.546450033776	12	0.330603101295672
ebi-a-GCST90001918	ieu-a-1163	ebi-a-GCST90001918	CD45 on HLA DR+ T cell || id:ebi-a-GCST90001918	|| id:ieu-a-1163	Inverse variance weighted	13.5500861677872	13	0.406273801406635
ebi-a-GCST90001934	ieu-a-1163	ebi-a-GCST90001934	CD25 on CD45RA+ CD4 not regulatory T cell || id:ebi-a-GCST90001934	|| id:ieu-a-1163	MR Egger	9.65329189059995	12	0.646347653601135
ebi-a-GCST90001934	ieu-a-1163	ebi-a-GCST90001934	CD25 on CD45RA+ CD4 not regulatory T cell || id:ebi-a-GCST90001934	|| id:ieu-a-1163	Inverse variance weighted	10.0897226408083	13	0.686581482771399
ebi-a-GCST90001961	ieu-a-1163	ebi-a-GCST90001961	CD25 on CD39+ CD4+ T cell || id:ebi-a-GCST90001961	|| id:ieu-a-1163	MR Egger	12.6860552566169	12	0.392266385209728
ebi-a-GCST90001961	ieu-a-1163	ebi-a-GCST90001961	CD25 on CD39+ CD4+ T cell || id:ebi-a-GCST90001961	|| id:ieu-a-1163	Inverse variance weighted	12.6888941996386	13	0.472119317249526
ebi-a-GCST90001963	ieu-a-1163	ebi-a-GCST90001963	FSC-A on myeloid Dendritic Cell || id:ebi-a-GCST90001963	|| id:ieu-a-1163	MR Egger	5.59466049031452	12	0.935122281431283
ebi-a-GCST90001963	ieu-a-1163	ebi-a-GCST90001963	FSC-A on myeloid Dendritic Cell || id:ebi-a-GCST90001963	|| id:ieu-a-1163	Inverse variance weighted	6.37595005886601	13	0.931394182048049
ebi-a-GCST90001965	ieu-a-1163	ebi-a-GCST90001965	FSC-A on monocyte || id:ebi-a-GCST90001965	|| id:ieu-a-1163	MR Egger	15.3761498824459	12	0.221507521487985
ebi-a-GCST90001965	ieu-a-1163	ebi-a-GCST90001965	FSC-A on monocyte || id:ebi-a-GCST90001965	|| id:ieu-a-1163	Inverse variance weighted	17.1592285567003	13	0.192126947793356
ebi-a-GCST90001968	ieu-a-1163	ebi-a-GCST90001968	FSC-A on B cell || id:ebi-a-GCST90001968	|| id:ieu-a-1163	MR Egger	12.5974385282611	12	0.398966258561178
ebi-a-GCST90001968	ieu-a-1163	ebi-a-GCST90001968	FSC-A on B cell || id:ebi-a-GCST90001968	|| id:ieu-a-1163	Inverse variance weighted	15.9984471904666	13	0.249213712253998
ebi-a-GCST90001971	ieu-a-1163	ebi-a-GCST90001971	FSC-A on lymphocyte || id:ebi-a-GCST90001971	|| id:ieu-a-1163	MR Egger	8.8981593170287	12	0.711603506336077
ebi-a-GCST90001971	ieu-a-1163	ebi-a-GCST90001971	FSC-A on lymphocyte || id:ebi-a-GCST90001971	|| id:ieu-a-1163	Inverse variance weighted	10.2356550890781	13	0.674559802083327
ebi-a-GCST90001972	ieu-a-1163	ebi-a-GCST90001972	FSC-A on T cell || id:ebi-a-GCST90001972	|| id:ieu-a-1163	MR Egger	9.1223092976905	12	0.692449609720487
ebi-a-GCST90001972	ieu-a-1163	ebi-a-GCST90001972	FSC-A on T cell || id:ebi-a-GCST90001972	|| id:ieu-a-1163	Inverse variance weighted	9.94197663253095	13	0.698672125529418
ebi-a-GCST90001975	ieu-a-1163	ebi-a-GCST90001975	FSC-A on HLA DR+ T cell || id:ebi-a-GCST90001975	|| id:ieu-a-1163	MR Egger	13.6584781834295	12	0.323046714510446
ebi-a-GCST90001975	ieu-a-1163	ebi-a-GCST90001975	FSC-A on HLA DR+ T cell || id:ebi-a-GCST90001975	|| id:ieu-a-1163	Inverse variance weighted	13.8351638463489	13	0.385554216671226
ebi-a-GCST90001981	ieu-a-1163	ebi-a-GCST90001981	CD40 on CD14+ CD16+ monocyte || id:ebi-a-GCST90001981	|| id:ieu-a-1163	MR Egger	8.7824652062276	12	0.72138993398531
ebi-a-GCST90001981	ieu-a-1163	ebi-a-GCST90001981	CD40 on CD14+ CD16+ monocyte || id:ebi-a-GCST90001981	|| id:ieu-a-1163	Inverse variance weighted	9.56130371720601	13	0.729354012022925
ebi-a-GCST90001987	ieu-a-1163	ebi-a-GCST90001987	CD64 on CD14+ CD16- monocyte || id:ebi-a-GCST90001987	|| id:ieu-a-1163	MR Egger	11.0003934023292	12	0.528884972113165
ebi-a-GCST90001987	ieu-a-1163	ebi-a-GCST90001987	CD64 on CD14+ CD16- monocyte || id:ebi-a-GCST90001987	|| id:ieu-a-1163	Inverse variance weighted	11.0182587634791	13	0.609287956393784
ebi-a-GCST90001988	ieu-a-1163	ebi-a-GCST90001988	HLA DR on CD14+ CD16- monocyte || id:ebi-a-GCST90001988	|| id:ieu-a-1163	MR Egger	16.8665187589269	12	0.154687794955916
ebi-a-GCST90001988	ieu-a-1163	ebi-a-GCST90001988	HLA DR on CD14+ CD16- monocyte || id:ebi-a-GCST90001988	|| id:ieu-a-1163	Inverse variance weighted	16.9022550658534	13	0.203811032721707
ebi-a-GCST90001989	ieu-a-1163	ebi-a-GCST90001989	CD40 on CD14- CD16+ monocyte || id:ebi-a-GCST90001989	|| id:ieu-a-1163	MR Egger	10.3005525246763	12	0.58961161767195
ebi-a-GCST90001989	ieu-a-1163	ebi-a-GCST90001989	CD40 on CD14- CD16+ monocyte || id:ebi-a-GCST90001989	|| id:ieu-a-1163	Inverse variance weighted	10.3451662977728	13	0.665494574027381
ebi-a-GCST90001990	ieu-a-1163	ebi-a-GCST90001990	CD64 on CD14- CD16+ monocyte || id:ebi-a-GCST90001990	|| id:ieu-a-1163	MR Egger	4.91691331573033	12	0.960696617993521
ebi-a-GCST90001990	ieu-a-1163	ebi-a-GCST90001990	CD64 on CD14- CD16+ monocyte || id:ebi-a-GCST90001990	|| id:ieu-a-1163	Inverse variance weighted	4.93259743126696	13	0.976647040131536
ebi-a-GCST90001991	ieu-a-1163	ebi-a-GCST90001991	HLA DR on CD14+ monocyte || id:ebi-a-GCST90001991	|| id:ieu-a-1163	MR Egger	17.1794534462002	12	0.142970656531778
ebi-a-GCST90001991	ieu-a-1163	ebi-a-GCST90001991	HLA DR on CD14+ monocyte || id:ebi-a-GCST90001991	|| id:ieu-a-1163	Inverse variance weighted	17.1823640091576	13	0.191101012287628
ebi-a-GCST90001998	ieu-a-1163	ebi-a-GCST90001998	PDL-1 on CD14+ CD16+ monocyte || id:ebi-a-GCST90001998	|| id:ieu-a-1163	MR Egger	6.70906842456417	12	0.876225587612529
ebi-a-GCST90001998	ieu-a-1163	ebi-a-GCST90001998	PDL-1 on CD14+ CD16+ monocyte || id:ebi-a-GCST90001998	|| id:ieu-a-1163	Inverse variance weighted	7.15216139647253	13	0.894140590951639
ebi-a-GCST90002006	ieu-a-1163	ebi-a-GCST90002006	CD64 on monocyte || id:ebi-a-GCST90002006	|| id:ieu-a-1163	MR Egger	6.97668311080965	12	0.859150576093398
ebi-a-GCST90002006	ieu-a-1163	ebi-a-GCST90002006	CD64 on monocyte || id:ebi-a-GCST90002006	|| id:ieu-a-1163	Inverse variance weighted	6.98646389193013	13	0.902847781863927
ebi-a-GCST90002011	ieu-a-1163	ebi-a-GCST90002011	CD64 on CD14+ CD16+ monocyte || id:ebi-a-GCST90002011	|| id:ieu-a-1163	MR Egger	7.13759856885101	10	0.712394094341425
ebi-a-GCST90002011	ieu-a-1163	ebi-a-GCST90002011	CD64 on CD14+ CD16+ monocyte || id:ebi-a-GCST90002011	|| id:ieu-a-1163	Inverse variance weighted	7.15866091354759	11	0.786093073700227
ebi-a-GCST90002017	ieu-a-1163	ebi-a-GCST90002017	CCR2 on monocyte || id:ebi-a-GCST90002017	|| id:ieu-a-1163	MR Egger	7.71754181281845	12	0.806795731384117
ebi-a-GCST90002017	ieu-a-1163	ebi-a-GCST90002017	CCR2 on monocyte || id:ebi-a-GCST90002017	|| id:ieu-a-1163	Inverse variance weighted	7.78955232539346	13	0.857035042219537
ebi-a-GCST90002044	ieu-a-1163	ebi-a-GCST90002044	CD45 on CD33dim HLA DR+ CD11b- || id:ebi-a-GCST90002044	|| id:ieu-a-1163	MR Egger	12.1659667397844	12	0.432444430556986
ebi-a-GCST90002044	ieu-a-1163	ebi-a-GCST90002044	CD45 on CD33dim HLA DR+ CD11b- || id:ebi-a-GCST90002044	|| id:ieu-a-1163	Inverse variance weighted	12.1678407215354	13	0.513931313637713
ebi-a-GCST90002048	ieu-a-1163	ebi-a-GCST90002048	CD45 on CD66b++ myelod cell || id:ebi-a-GCST90002048	|| id:ieu-a-1163	MR Egger	8.62885214125387	12	0.734261741611865
ebi-a-GCST90002048	ieu-a-1163	ebi-a-GCST90002048	CD45 on CD66b++ myelod cell || id:ebi-a-GCST90002048	|| id:ieu-a-1163	Inverse variance weighted	8.77316428563621	13	0.789851440374165
ebi-a-GCST90002063	ieu-a-1163	ebi-a-GCST90002063	CD4 on CD4 regulatory T cell || id:ebi-a-GCST90002063	|| id:ieu-a-1163	MR Egger	10.0097987030978	12	0.615100979190717
ebi-a-GCST90002063	ieu-a-1163	ebi-a-GCST90002063	CD4 on CD4 regulatory T cell || id:ebi-a-GCST90002063	|| id:ieu-a-1163	Inverse variance weighted	12.1888168244064	13	0.512225027249936
ebi-a-GCST90002070	ieu-a-1163	ebi-a-GCST90002070	CD4 on activated & secreting CD4 regulatory T cell || id:ebi-a-GCST90002070	|| id:ieu-a-1163	MR Egger	10.743963060331	12	0.550979212902631
ebi-a-GCST90002070	ieu-a-1163	ebi-a-GCST90002070	CD4 on activated & secreting CD4 regulatory T cell || id:ebi-a-GCST90002070	|| id:ieu-a-1163	Inverse variance weighted	12.3856385454611	13	0.496303164541552
ebi-a-GCST90002071	ieu-a-1163	ebi-a-GCST90002071	SSC-A on myeloid Dendritic Cell || id:ebi-a-GCST90002071	|| id:ieu-a-1163	MR Egger	6.94738727887046	12	0.861070739066691
ebi-a-GCST90002071	ieu-a-1163	ebi-a-GCST90002071	SSC-A on myeloid Dendritic Cell || id:ebi-a-GCST90002071	|| id:ieu-a-1163	Inverse variance weighted	8.24630093841061	13	0.827192126121031
ebi-a-GCST90002073	ieu-a-1163	ebi-a-GCST90002073	SSC-A on monocyte || id:ebi-a-GCST90002073	|| id:ieu-a-1163	MR Egger	16.5867207481798	12	0.165815790593419
ebi-a-GCST90002073	ieu-a-1163	ebi-a-GCST90002073	SSC-A on monocyte || id:ebi-a-GCST90002073	|| id:ieu-a-1163	Inverse variance weighted	20.1036388879387	13	0.0926560019097518
ebi-a-GCST90002074	ieu-a-1163	ebi-a-GCST90002074	SSC-A on CD14+ monocyte || id:ebi-a-GCST90002074	|| id:ieu-a-1163	MR Egger	12.4115550601438	12	0.413218394043997
ebi-a-GCST90002074	ieu-a-1163	ebi-a-GCST90002074	SSC-A on CD14+ monocyte || id:ebi-a-GCST90002074	|| id:ieu-a-1163	Inverse variance weighted	15.1374520260588	13	0.298850730810001
ebi-a-GCST90002078	ieu-a-1163	ebi-a-GCST90002078	SSC-A on granulocyte || id:ebi-a-GCST90002078	|| id:ieu-a-1163	MR Egger	12.1862540223017	12	0.430839720504887
ebi-a-GCST90002078	ieu-a-1163	ebi-a-GCST90002078	SSC-A on granulocyte || id:ebi-a-GCST90002078	|| id:ieu-a-1163	Inverse variance weighted	13.2227347358015	13	0.430758026321796
ebi-a-GCST90002079	ieu-a-1163	ebi-a-GCST90002079	SSC-A on lymphocyte || id:ebi-a-GCST90002079	|| id:ieu-a-1163	MR Egger	9.83577345019985	12	0.630365590728105
ebi-a-GCST90002079	ieu-a-1163	ebi-a-GCST90002079	SSC-A on lymphocyte || id:ebi-a-GCST90002079	|| id:ieu-a-1163	Inverse variance weighted	10.7548062998221	13	0.631349797056557
ebi-a-GCST90002080	ieu-a-1163	ebi-a-GCST90002080	SSC-A on T cell || id:ebi-a-GCST90002080	|| id:ieu-a-1163	MR Egger	11.0038876665851	12	0.528585541640655
ebi-a-GCST90002080	ieu-a-1163	ebi-a-GCST90002080	SSC-A on T cell || id:ebi-a-GCST90002080	|| id:ieu-a-1163	Inverse variance weighted	11.6556407632279	13	0.556063129138832
ebi-a-GCST90002081	ieu-a-1163	ebi-a-GCST90002081	SSC-A on CD4+ T cell || id:ebi-a-GCST90002081	|| id:ieu-a-1163	MR Egger	6.17623170957236	12	0.90693877810305
ebi-a-GCST90002081	ieu-a-1163	ebi-a-GCST90002081	SSC-A on CD4+ T cell || id:ebi-a-GCST90002081	|| id:ieu-a-1163	Inverse variance weighted	7.37664633026584	13	0.88171283663918
ebi-a-GCST90002083	ieu-a-1163	ebi-a-GCST90002083	SSC-A on HLA DR+ T cell || id:ebi-a-GCST90002083	|| id:ieu-a-1163	MR Egger	11.8029792199837	12	0.461629670393341
ebi-a-GCST90002083	ieu-a-1163	ebi-a-GCST90002083	SSC-A on HLA DR+ T cell || id:ebi-a-GCST90002083	|| id:ieu-a-1163	Inverse variance weighted	11.9119379395934	13	0.534877877957336
ebi-a-GCST90002085	ieu-a-1163	ebi-a-GCST90002085	SSC-A on HLA DR+ CD4+ T cell || id:ebi-a-GCST90002085	|| id:ieu-a-1163	MR Egger	8.09472621224867	12	0.777684711644378
ebi-a-GCST90002085	ieu-a-1163	ebi-a-GCST90002085	SSC-A on HLA DR+ CD4+ T cell || id:ebi-a-GCST90002085	|| id:ieu-a-1163	Inverse variance weighted	8.53562115781838	13	0.807042221499253
ebi-a-GCST90002097	ieu-a-1163	ebi-a-GCST90002097	CD11b on CD33+ HLA DR+ CD14dim || id:ebi-a-GCST90002097	|| id:ieu-a-1163	MR Egger	11.6292229241418	12	0.475897531884812
ebi-a-GCST90002097	ieu-a-1163	ebi-a-GCST90002097	CD11b on CD33+ HLA DR+ CD14dim || id:ebi-a-GCST90002097	|| id:ieu-a-1163	Inverse variance weighted	11.9789607809477	13	0.529369829724303
ebi-a-GCST90002118	ieu-a-1163	ebi-a-GCST90002118	CD8 on CD28+ CD45RA- CD8+ T cell || id:ebi-a-GCST90002118	|| id:ieu-a-1163	MR Egger	12.213975503574	12	0.428651690977979
ebi-a-GCST90002118	ieu-a-1163	ebi-a-GCST90002118	CD8 on CD28+ CD45RA- CD8+ T cell || id:ebi-a-GCST90002118	|| id:ieu-a-1163	Inverse variance weighted	12.2398133498927	13	0.508084078315416
ebi-a-GCST90002119	ieu-a-1163	ebi-a-GCST90002119	CD8 on CD28+ CD45RA+ CD8+ T cell || id:ebi-a-GCST90002119	|| id:ieu-a-1163	MR Egger	15.0721150467403	12	0.237516354869171
ebi-a-GCST90002119	ieu-a-1163	ebi-a-GCST90002119	CD8 on CD28+ CD45RA+ CD8+ T cell || id:ebi-a-GCST90002119	|| id:ieu-a-1163	Inverse variance weighted	17.2469921008524	13	0.188257650656382
ebi-a-GCST90002120	ieu-a-1163	ebi-a-GCST90002120	CD8 on CD28- CD8+ T cell || id:ebi-a-GCST90002120	|| id:ieu-a-1163	MR Egger	3.19438311050054	12	0.994009107755396
ebi-a-GCST90002120	ieu-a-1163	ebi-a-GCST90002120	CD8 on CD28- CD8+ T cell || id:ebi-a-GCST90002120	|| id:ieu-a-1163	Inverse variance weighted	3.30937934296122	13	0.996568090673633
