# Supplementary material for: Dissecting the Genetic Causality Between Immune Cell Traits and ER-Negative Breast Cancer Outcomes
Source: Research Square preprint supplement (doi:10.21203/rs.3.rs-7166891/v1), 2025-08-21
Supplement: Supplementary file 2 [file 42917007ed646f7ca4bd890d.xlsx]

## Sheet: pleiotropy_results-1
id	id.exposure	id.outcome	outcome	exposure	egger_intercept	se	pval
ebi-a-GCST90001395	ieu-a-1163	ebi-a-GCST90001395	IgD+ CD38- B cell %B cell || id:ebi-a-GCST90001395	|| id:ieu-a-1163	0.0160156124946206	0.0262140546628142	0.552626252716849
ebi-a-GCST90001396	ieu-a-1163	ebi-a-GCST90001396	IgD+ CD38- B cell Absolute Count || id:ebi-a-GCST90001396	|| id:ieu-a-1163	0.00964716240469863	0.0266393421180352	0.723544843410968
ebi-a-GCST90001398	ieu-a-1163	ebi-a-GCST90001398	Unswitched memory B cell Absolute Count || id:ebi-a-GCST90001398	|| id:ieu-a-1163	-0.0118995	0.0263972706114743	0.660182155915105
ebi-a-GCST90001431	ieu-a-1163	ebi-a-GCST90001431	IgD+ CD38- B cell %lymphocyte || id:ebi-a-GCST90001431	|| id:ieu-a-1163	0.0085898809988469	0.0266356020924105	0.752626258344432
ebi-a-GCST90001432	ieu-a-1163	ebi-a-GCST90001432	Unswitched memory B cell %lymphocyte || id:ebi-a-GCST90001432	|| id:ieu-a-1163	-0.0130861	0.0263106130318385	0.627915826148216
ebi-a-GCST90001450	ieu-a-1163	ebi-a-GCST90001450	CD62L- monocyte Absolute Count || id:ebi-a-GCST90001450	|| id:ieu-a-1163	0.0378379550248625	0.033329249028733	0.278426161461429
ebi-a-GCST90001452	ieu-a-1163	ebi-a-GCST90001452	CD11c+ CD62L- monocyte Absolute Count || id:ebi-a-GCST90001452	|| id:ieu-a-1163	0.0345737489348624	0.0280090185929165	0.240688639034172
ebi-a-GCST90001454	ieu-a-1163	ebi-a-GCST90001454	CD62L- HLA DR++ monocyte Absolute Count || id:ebi-a-GCST90001454	|| id:ieu-a-1163	0.0253622434689591	0.02814119113514	0.38518700484514
ebi-a-GCST90001455	ieu-a-1163	ebi-a-GCST90001455	CD62L- HLA DR++ monocyte %monocyte || id:ebi-a-GCST90001455	|| id:ieu-a-1163	0.00441860978620123	0.0286698104521189	0.880076255936189
ebi-a-GCST90001456	ieu-a-1163	ebi-a-GCST90001456	CD11c+ HLA DR++ monocyte Absolute Count || id:ebi-a-GCST90001456	|| id:ieu-a-1163	0.0173320172648644	0.0285478271083141	0.555083855094586
ebi-a-GCST90001526	ieu-a-1163	ebi-a-GCST90001526	CD33dim HLA DR+ CD11b+ %CD33dim HLA DR+ || id:ebi-a-GCST90001526	|| id:ieu-a-1163	-0.0244624	0.0364667514704294	0.515043777036044
ebi-a-GCST90001528	ieu-a-1163	ebi-a-GCST90001528	CD33dim HLA DR+ CD11b- %CD33dim HLA DR+ || id:ebi-a-GCST90001528	|| id:ieu-a-1163	0.0202586339613756	0.0364919244048741	0.588988643220791
ebi-a-GCST90001567	ieu-a-1163	ebi-a-GCST90001567	Naive CD4-CD8- T cell %CD4-CD8- T cell || id:ebi-a-GCST90001567	|| id:ieu-a-1163	-0.0288045	0.024483149788313	0.262205011919042
ebi-a-GCST90001579	ieu-a-1163	ebi-a-GCST90001579	CD14- CD16+ monocyte Absolute Count || id:ebi-a-GCST90001579	|| id:ieu-a-1163	-0.00220657	0.026190445093817	0.934246283126072
ebi-a-GCST90001584	ieu-a-1163	ebi-a-GCST90001584	CD14- CD16+ monocyte %monocyte || id:ebi-a-GCST90001584	|| id:ieu-a-1163	-0.00672237	0.0259711503303195	0.800145449202805
ebi-a-GCST90001593	ieu-a-1163	ebi-a-GCST90001593	CD8+ T cell %T cell || id:ebi-a-GCST90001593	|| id:ieu-a-1163	-0.00683822	0.02630544694817	0.799305532580771
ebi-a-GCST90001606	ieu-a-1163	ebi-a-GCST90001606	CD4+ T cell %leukocyte || id:ebi-a-GCST90001606	|| id:ieu-a-1163	-0.00250544	0.0283172977082052	0.930956607809763
ebi-a-GCST90001674	ieu-a-1163	ebi-a-GCST90001674	CD28- CD127- CD25++ CD8+ T cell %CD8+ T cell || id:ebi-a-GCST90001674	|| id:ieu-a-1163	0.00592702703933807	0.0275957086807859	0.833544998464351
ebi-a-GCST90001677	ieu-a-1163	ebi-a-GCST90001677	CD28- CD25++ CD8+ T cell %CD8+ T cell || id:ebi-a-GCST90001677	|| id:ieu-a-1163	-0.00699975	0.0263594289110386	0.795092841407429
ebi-a-GCST90001698	ieu-a-1163	ebi-a-GCST90001698	CD45RA+ CD28- CD8+ T cell Absolute Count || id:ebi-a-GCST90001698	|| id:ieu-a-1163	1.59658655958406	5.59901848476122	0.780387457045318
ebi-a-GCST90001810	ieu-a-1163	ebi-a-GCST90001810	CD38 on CD3- CD19- || id:ebi-a-GCST90001810	|| id:ieu-a-1163	-0.0223129	0.0453901508894054	0.631884760047486
ebi-a-GCST90001820	ieu-a-1163	ebi-a-GCST90001820	IgD on IgD+ CD24+ B cell || id:ebi-a-GCST90001820	|| id:ieu-a-1163	0.0213240103354528	0.0308322965520071	0.502342492685997
ebi-a-GCST90001821	ieu-a-1163	ebi-a-GCST90001821	IgD on IgD+ CD24- B cell || id:ebi-a-GCST90001821	|| id:ieu-a-1163	0.0104057253319893	0.0276266189436214	0.713005090618742
ebi-a-GCST90001824	ieu-a-1163	ebi-a-GCST90001824	IgD on IgD+ CD38+ B cell || id:ebi-a-GCST90001824	|| id:ieu-a-1163	0.0237718797677146	0.0266242870515671	0.389484333501374
ebi-a-GCST90001830	ieu-a-1163	ebi-a-GCST90001830	BAFF-R on CD20- B cell || id:ebi-a-GCST90001830	|| id:ieu-a-1163	0.027796106145598	0.0263653877750144	0.31436820845058
ebi-a-GCST90001834	ieu-a-1163	ebi-a-GCST90001834	CD62L on monocyte || id:ebi-a-GCST90001834	|| id:ieu-a-1163	0.00397444654120414	0.0347110923055533	0.911107214506671
ebi-a-GCST90001850	ieu-a-1163	ebi-a-GCST90001850	CD3 on HLA DR+ CD8+ T cell || id:ebi-a-GCST90001850	|| id:ieu-a-1163	0.0688136246174348	0.028642749468196	0.0333674131990137
ebi-a-GCST90001852	ieu-a-1163	ebi-a-GCST90001852	CD3 on CD39+ resting CD4 regulatory T cell || id:ebi-a-GCST90001852	|| id:ieu-a-1163	0.000776260762546485	0.0298394719141155	0.979673337141066
ebi-a-GCST90001862	ieu-a-1163	ebi-a-GCST90001862	CD3 on CD28+ CD4-CD8- T cell || id:ebi-a-GCST90001862	|| id:ieu-a-1163	0.0286243222249274	0.0305175753046257	0.3667593901881
ebi-a-GCST90001872	ieu-a-1163	ebi-a-GCST90001872	HVEM on naive CD8+ T cell || id:ebi-a-GCST90001872	|| id:ieu-a-1163	-0.00249332	0.0450121327363386	0.95673761791355
ebi-a-GCST90001884	ieu-a-1163	ebi-a-GCST90001884	CD16-CD56 on Natural Killer || id:ebi-a-GCST90001884	|| id:ieu-a-1163	-0.00277588	0.0290218168243144	0.925378884816123
ebi-a-GCST90001894	ieu-a-1163	ebi-a-GCST90001894	CD28 on CD28+ CD4+ T cell || id:ebi-a-GCST90001894	|| id:ieu-a-1163	-0.0320931	0.0293782408973365	0.296098404406494
ebi-a-GCST90001898	ieu-a-1163	ebi-a-GCST90001898	CD28 on CD4+ T cell || id:ebi-a-GCST90001898	|| id:ieu-a-1163	-0.0297435	0.0293950176757823	0.33157559840005
ebi-a-GCST90001918	ieu-a-1163	ebi-a-GCST90001918	CD45 on HLA DR+ T cell || id:ebi-a-GCST90001918	|| id:ieu-a-1163	-0.00173435	0.030558992178925	0.95567507964922
ebi-a-GCST90001934	ieu-a-1163	ebi-a-GCST90001934	CD25 on CD45RA+ CD4 not regulatory T cell || id:ebi-a-GCST90001934	|| id:ieu-a-1163	0.0173361224280276	0.0262418406503913	0.52133083604039
ebi-a-GCST90001961	ieu-a-1163	ebi-a-GCST90001961	CD25 on CD39+ CD4+ T cell || id:ebi-a-GCST90001961	|| id:ieu-a-1163	-0.00157722	0.0304359012374282	0.959523981273663
ebi-a-GCST90001963	ieu-a-1163	ebi-a-GCST90001963	FSC-A on myeloid Dendritic Cell || id:ebi-a-GCST90001963	|| id:ieu-a-1163	-0.0264096	0.0298783161727191	0.394111688023971
ebi-a-GCST90001965	ieu-a-1163	ebi-a-GCST90001965	FSC-A on monocyte || id:ebi-a-GCST90001965	|| id:ieu-a-1163	-0.0398587	0.0337887066445312	0.260998983480947
ebi-a-GCST90001968	ieu-a-1163	ebi-a-GCST90001968	FSC-A on B cell || id:ebi-a-GCST90001968	|| id:ieu-a-1163	-0.052776	0.029321291656799	0.0970457865444593
ebi-a-GCST90001971	ieu-a-1163	ebi-a-GCST90001971	FSC-A on lymphocyte || id:ebi-a-GCST90001971	|| id:ieu-a-1163	-0.0303574	0.0262493109165866	0.269981152635007
ebi-a-GCST90001972	ieu-a-1163	ebi-a-GCST90001972	FSC-A on T cell || id:ebi-a-GCST90001972	|| id:ieu-a-1163	-0.0241335	0.0266564340711424	0.383095246232493
ebi-a-GCST90001975	ieu-a-1163	ebi-a-GCST90001975	FSC-A on HLA DR+ T cell || id:ebi-a-GCST90001975	|| id:ieu-a-1163	-0.0117822	0.0299045527122025	0.70049671440567
ebi-a-GCST90001981	ieu-a-1163	ebi-a-GCST90001981	CD40 on CD14+ CD16+ monocyte || id:ebi-a-GCST90001981	|| id:ieu-a-1163	0.0235723237452652	0.0267102952236573	0.394831757954652
ebi-a-GCST90001987	ieu-a-1163	ebi-a-GCST90001987	CD64 on CD14+ CD16- monocyte || id:ebi-a-GCST90001987	|| id:ieu-a-1163	-0.00357458	0.0267435887821269	0.895885773688073
ebi-a-GCST90001988	ieu-a-1163	ebi-a-GCST90001988	HLA DR on CD14+ CD16- monocyte || id:ebi-a-GCST90001988	|| id:ieu-a-1163	0.00509706144336228	0.0319659148284351	0.875964331810497
ebi-a-GCST90001989	ieu-a-1163	ebi-a-GCST90001989	CD40 on CD14- CD16+ monocyte || id:ebi-a-GCST90001989	|| id:ieu-a-1163	0.00567481184082096	0.0268668647573233	0.836260341450752
ebi-a-GCST90001990	ieu-a-1163	ebi-a-GCST90001990	CD64 on CD14- CD16+ monocyte || id:ebi-a-GCST90001990	|| id:ieu-a-1163	-0.00333069	0.026595289758131	0.902410144086187
ebi-a-GCST90001991	ieu-a-1163	ebi-a-GCST90001991	HLA DR on CD14+ monocyte || id:ebi-a-GCST90001991	|| id:ieu-a-1163	0.00145733512462249	0.032321014339404	0.964777700324243
ebi-a-GCST90001998	ieu-a-1163	ebi-a-GCST90001998	PDL-1 on CD14+ CD16+ monocyte || id:ebi-a-GCST90001998	|| id:ieu-a-1163	0.017509142005592	0.0263037358306774	0.518224224585873
ebi-a-GCST90002006	ieu-a-1163	ebi-a-GCST90002006	CD64 on monocyte || id:ebi-a-GCST90002006	|| id:ieu-a-1163	-0.00265929	0.0268892490957718	0.922852262856012
ebi-a-GCST90002011	ieu-a-1163	ebi-a-GCST90002011	CD64 on CD14+ CD16+ monocyte || id:ebi-a-GCST90002011	|| id:ieu-a-1163	0.00396488911474672	0.0273198108411741	0.887492729979189
ebi-a-GCST90002017	ieu-a-1163	ebi-a-GCST90002017	CCR2 on monocyte || id:ebi-a-GCST90002017	|| id:ieu-a-1163	0.00804375967733843	0.0299751341640501	0.792989094217727
ebi-a-GCST90002044	ieu-a-1163	ebi-a-GCST90002044	CD45 on CD33dim HLA DR+ CD11b- || id:ebi-a-GCST90002044	|| id:ieu-a-1163	-0.00168736	0.0392472116575412	0.966414043642515
ebi-a-GCST90002048	ieu-a-1163	ebi-a-GCST90002048	CD45 on CD66b++ myelod cell || id:ebi-a-GCST90002048	|| id:ieu-a-1163	-0.0150424	0.0395971940561675	0.710669172816286
ebi-a-GCST90002063	ieu-a-1163	ebi-a-GCST90002063	CD4 on CD4 regulatory T cell || id:ebi-a-GCST90002063	|| id:ieu-a-1163	0.0434482754554596	0.0294335145114799	0.1656570105749
ebi-a-GCST90002070	ieu-a-1163	ebi-a-GCST90002070	CD4 on activated & secreting CD4 regulatory T cell || id:ebi-a-GCST90002070	|| id:ieu-a-1163	0.0378888916424063	0.0295711520684355	0.224302105257761
ebi-a-GCST90002071	ieu-a-1163	ebi-a-GCST90002071	SSC-A on myeloid Dendritic Cell || id:ebi-a-GCST90002071	|| id:ieu-a-1163	-0.0344681	0.0302431378165549	0.276650408301534
ebi-a-GCST90002073	ieu-a-1163	ebi-a-GCST90002073	SSC-A on monocyte || id:ebi-a-GCST90002073	|| id:ieu-a-1163	-0.0561033	0.0351720014968524	0.136670892113644
ebi-a-GCST90002074	ieu-a-1163	ebi-a-GCST90002074	SSC-A on CD14+ monocyte || id:ebi-a-GCST90002074	|| id:ieu-a-1163	-0.0470685	0.028993303661277	0.130458465738713
ebi-a-GCST90002078	ieu-a-1163	ebi-a-GCST90002078	SSC-A on granulocyte || id:ebi-a-GCST90002078	|| id:ieu-a-1163	-0.0291478	0.0288515862020399	0.332304954488112
ebi-a-GCST90002079	ieu-a-1163	ebi-a-GCST90002079	SSC-A on lymphocyte || id:ebi-a-GCST90002079	|| id:ieu-a-1163	-0.0257058	0.0268142543081833	0.356646500318569
ebi-a-GCST90002080	ieu-a-1163	ebi-a-GCST90002080	SSC-A on T cell || id:ebi-a-GCST90002080	|| id:ieu-a-1163	-0.0221266	0.0274077208096541	0.435197102950818
ebi-a-GCST90002081	ieu-a-1163	ebi-a-GCST90002081	SSC-A on CD4+ T cell || id:ebi-a-GCST90002081	|| id:ieu-a-1163	-0.0304515	0.0277934653499374	0.294741155414307
ebi-a-GCST90002083	ieu-a-1163	ebi-a-GCST90002083	SSC-A on HLA DR+ T cell || id:ebi-a-GCST90002083	|| id:ieu-a-1163	-0.00946923	0.0286869179256683	0.747023977066524
ebi-a-GCST90002085	ieu-a-1163	ebi-a-GCST90002085	SSC-A on HLA DR+ CD4+ T cell || id:ebi-a-GCST90002085	|| id:ieu-a-1163	-0.0186707	0.0281185516854958	0.519245378090242
ebi-a-GCST90002097	ieu-a-1163	ebi-a-GCST90002097	CD11b on CD33+ HLA DR+ CD14dim || id:ebi-a-GCST90002097	|| id:ieu-a-1163	0.022925452759556	0.0387656079452245	0.565235800366252
ebi-a-GCST90002118	ieu-a-1163	ebi-a-GCST90002118	CD8 on CD28+ CD45RA- CD8+ T cell || id:ebi-a-GCST90002118	|| id:ieu-a-1163	0.00472313552011812	0.0296442284061734	0.87606121277099
ebi-a-GCST90002119	ieu-a-1163	ebi-a-GCST90002119	CD8 on CD28+ CD45RA+ CD8+ T cell || id:ebi-a-GCST90002119	|| id:ieu-a-1163	0.0425594570509893	0.0323426201659613	0.212794139993754
ebi-a-GCST90002120	ieu-a-1163	ebi-a-GCST90002120	CD8 on CD28- CD8+ T cell || id:ebi-a-GCST90002120	|| id:ieu-a-1163	0.010025952094615	0.0295654040861015	0.740386722543529
